# Supplementary material
Source: publisher figshare collection journal article supplement (https://plos.figshare.com/ndownloader/files/38306804)

## Interaction of SATB1 with Full-length beta-catenin (1-781)

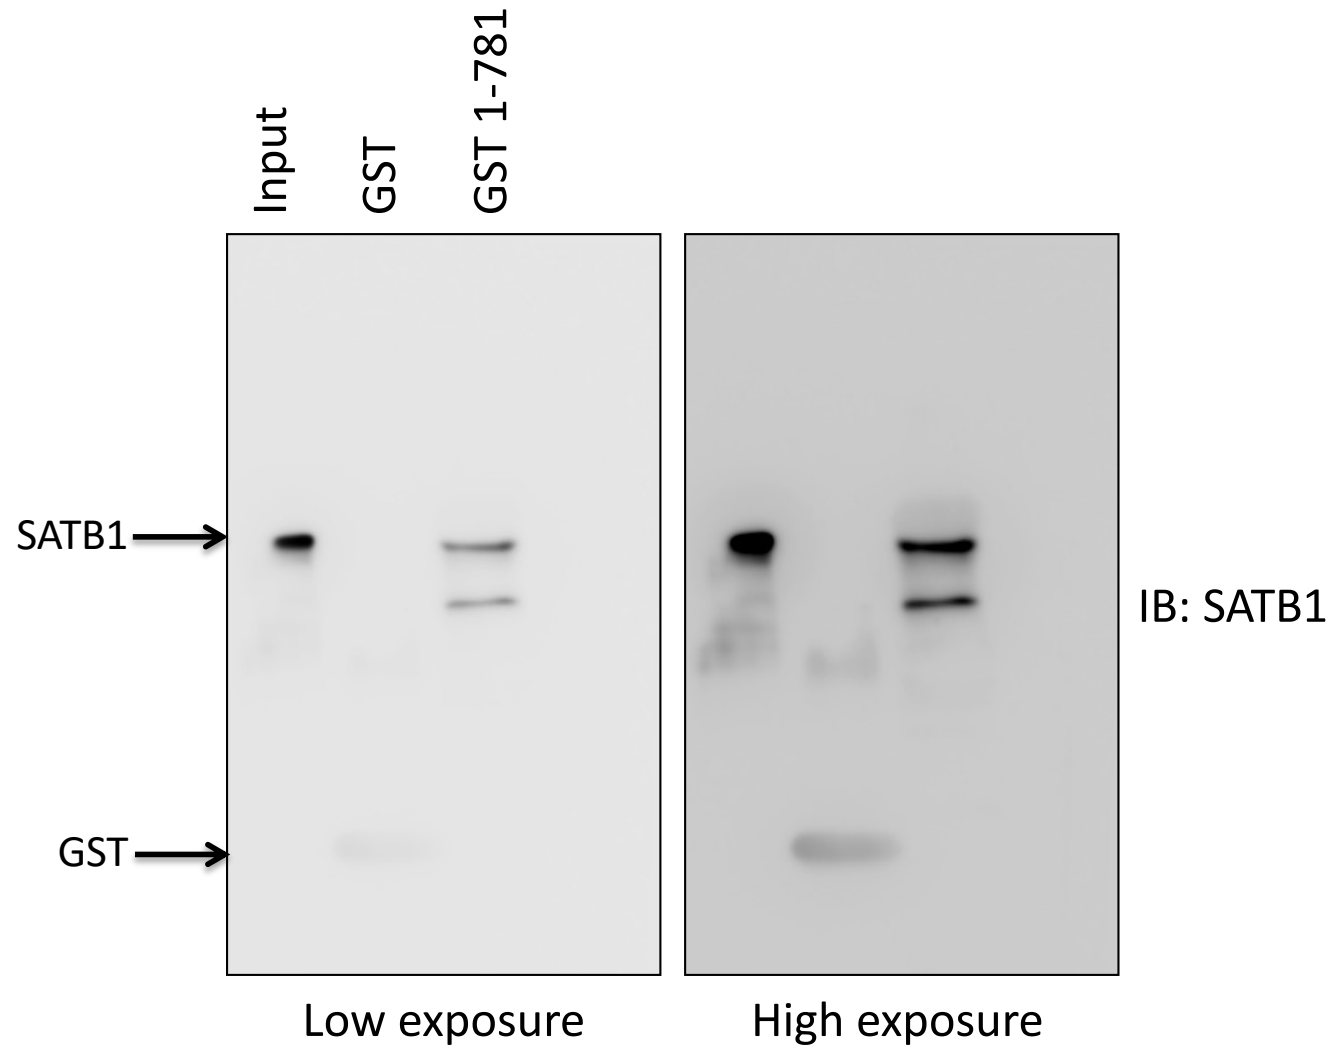

Pull down assay to monitor domain specific interactions (Fig. 1D)

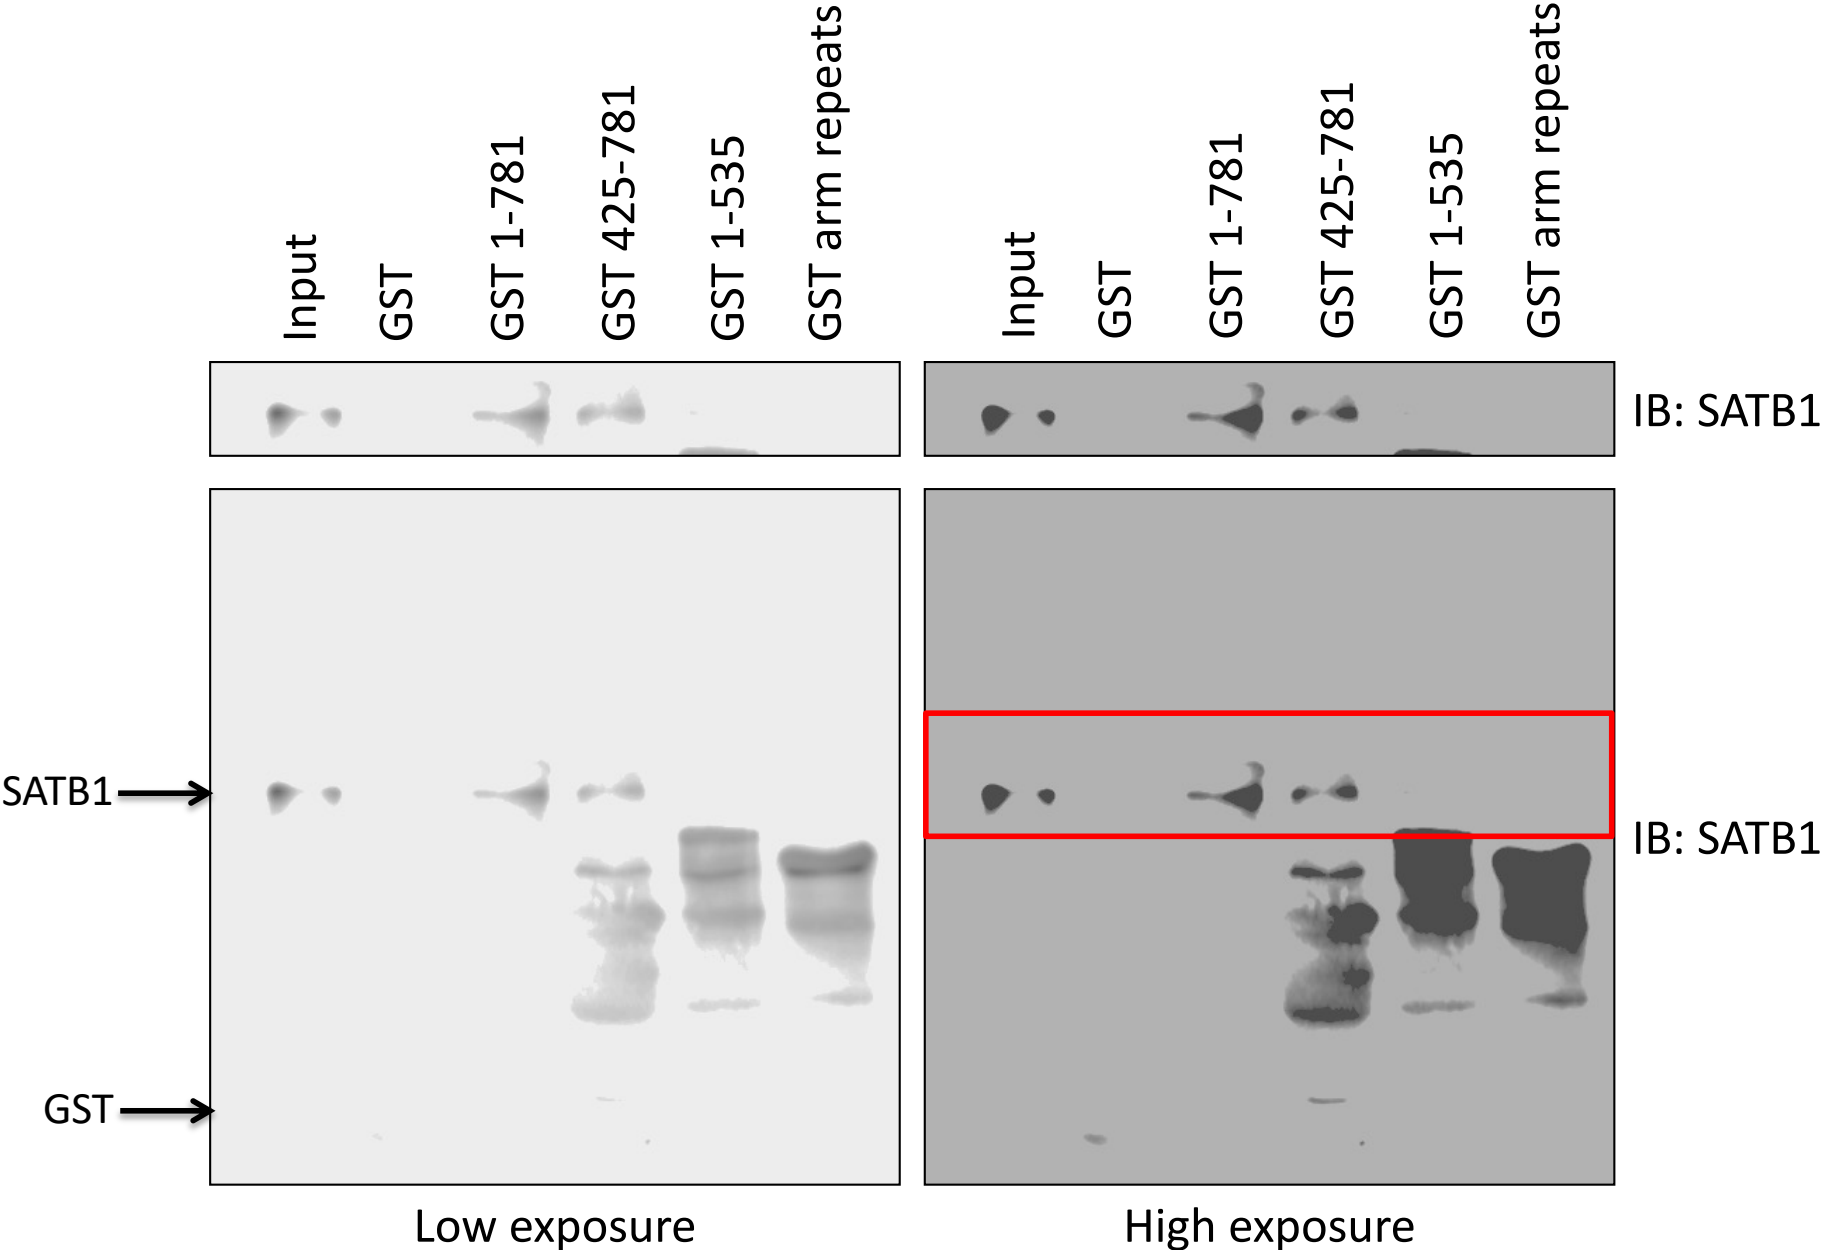

Supplement: Supplementary file 1 [file 38306804]
